# Supplementary material for: Interlayer grafting of kaolinite using trimethylphosphate
Source: Royal Society of Chemistry journal article supplement (doi:10.1039/c9dt02026h), 2019-01-01
Supplement: c9dt02026h1.pdf [file c9dt02026h1.pdf]

*Electrical Supporting Information*

# *Interlayer grafting of kaolinite using trimethylphosphate*

*Shingo Machida<sup>a</sup>, Naokazu Idota<sup>b</sup> and Yoshiyuki Sugahara<sup>a,c\*</sup>*

*<sup>a</sup>Department of Applied Chemistry, School of Advanced Science and Engineering,*

*Waseda University, 3-4-1 Okubo, Shinjuku-ku, Tokyo 169-8555, Japan*

*<sup>b</sup>Department of Chemical Science and Technology, Faculty of Bioscience and Applied*

*Chemistry, Hosei University, 3-7-2 Kajino-cho, Koganeishi, Tokyo 184-8584, Japan*

*<sup>c</sup>Kagami Memorial Institute for Materials Science and Technology, Waseda University,*

*2-8-26 Nishiwaseda, Shinjuku-ku, Tokyo 169-0051, Japan*

*\*E-mail: ys6546@waseda.jp*

Figures S

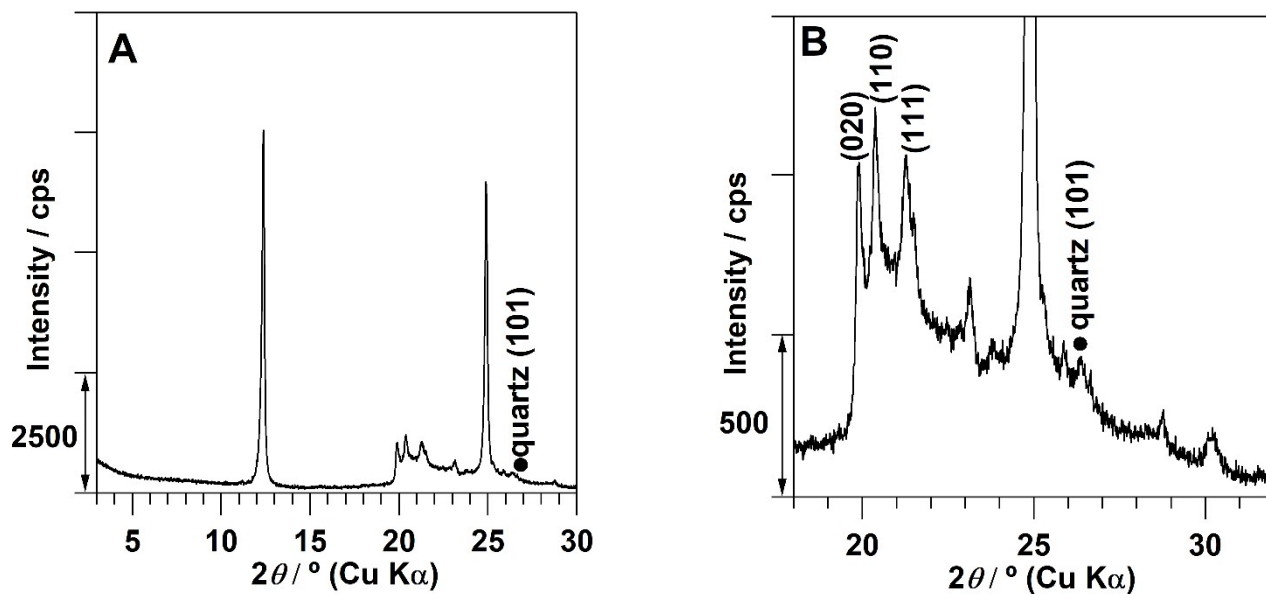

FigureS1. A is XRD pattern of the present Kanpaku kaolinite (filled circle indicates (101) diffraction line of quartz.) and B is enclosed to the 2θ range from 18° to 32° in the patterns of A.

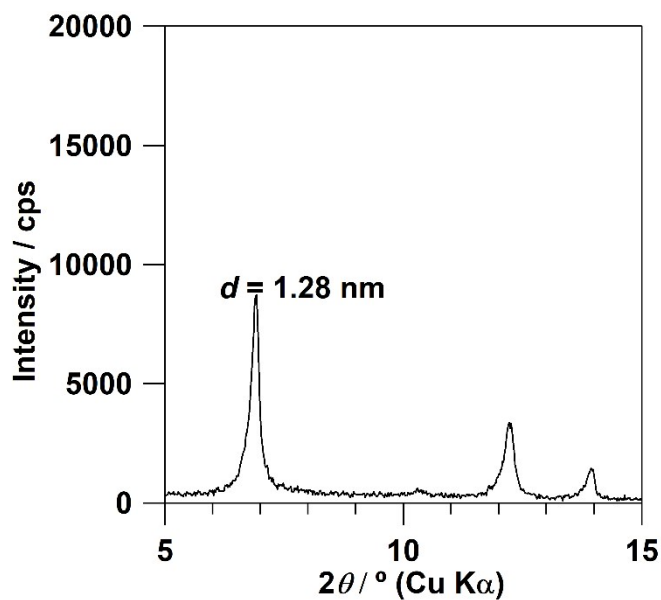

Figure S21. XRD pattern of TMP/MeO-Kaol\_RT\_1\_day.

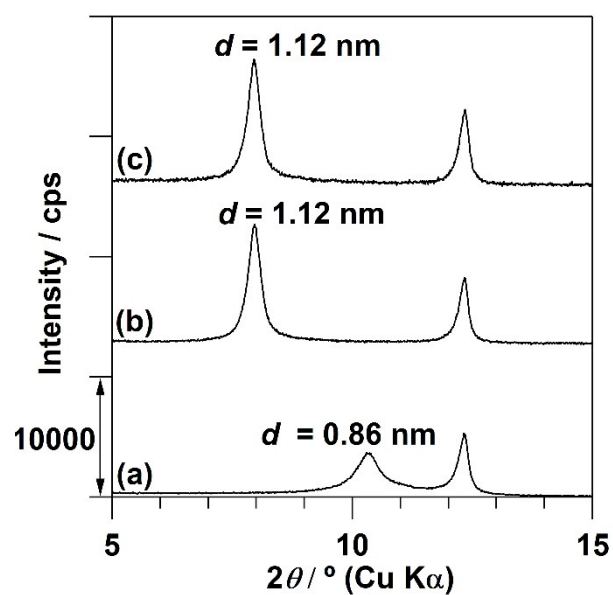

Figure S32. XRD patterns of (a) TMP/MeO-Kaol\_RT washed with an excess ethanol, (b) TMP/MeO-Kaol\_150 washed with an excess ethanol and (c) TMP/MeO-Kaol\_150 washed with an excess water.

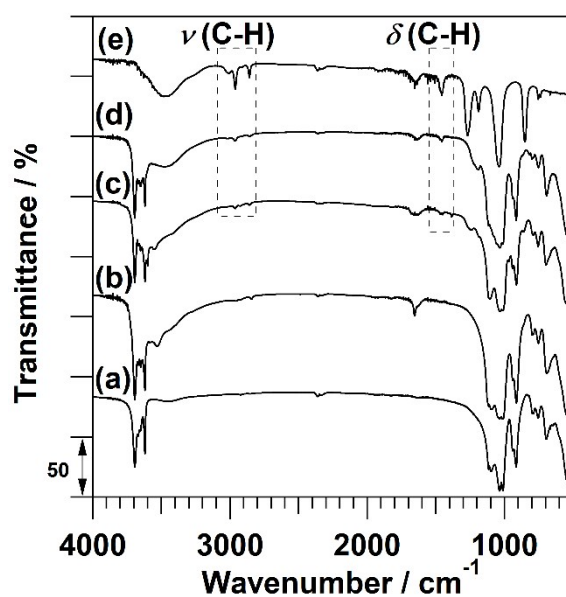

Figure S43. IR spectra of (a) kaolinite, (b) MeO-Kaol, (c) TMP/MeO-Kaol\_RT, (d) TMP/MeO-Kaol\_150 and (e) TMP in the range of 4000-500  $\text{cm}^{-1}$ .

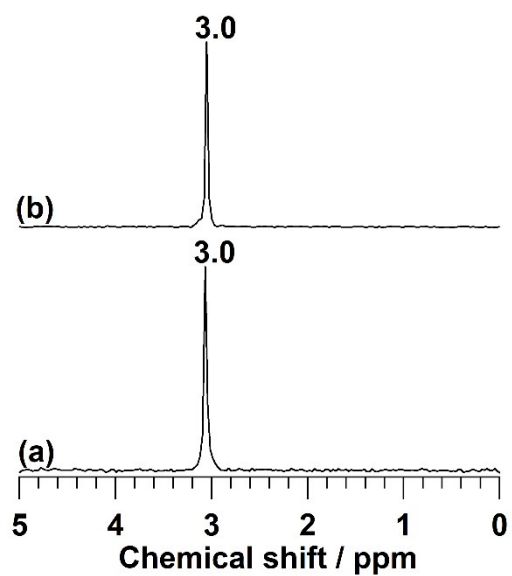

Figure S5. The  $^{31}\text{P}$  NMR spectra of (a) TMP\_ext\_CDCl<sub>3</sub> and (b) TMP in CDCl<sub>3</sub>.

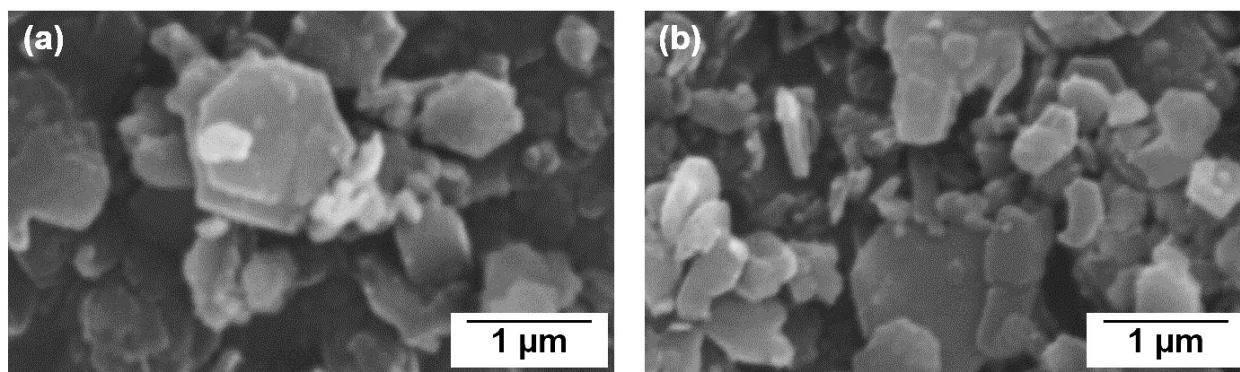

Figure S6. SEM images of (a) Kaolinite and (b) TMP/MeO-Kaol\_150.

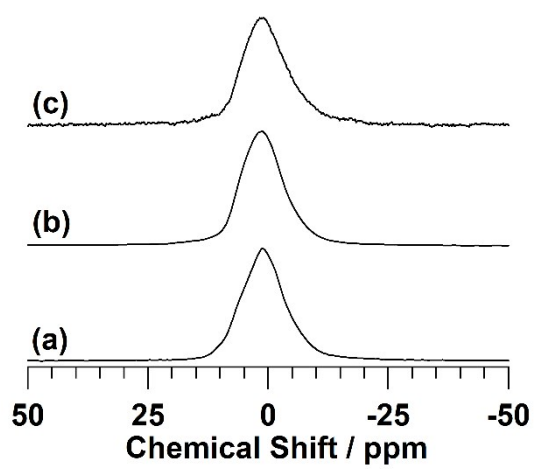

Figure S7.  $^{27}\text{Al}$  MAS NMR spectra of (a) kaolinite, (b) MeO-Kaol and (c) TMP/MeO-Kaol\_150.
